# Supplementary material for: High selectivity for n-dodecane hydroisomerization over highly siliceous ZSM-22 with low Pt loading
Source: Royal Society of Chemistry journal article supplement (doi:10.1039/c7cy01661a), 2017-01-01
Supplement: c7cy01661a1.pdf [file c7cy01661a1.pdf]

**Supplementary Information (SI)**

High selectivity for n-dodecane hydroisomerization over highly siliceous ZSM-22  
with low Pt loading

Pengyu Niu<sup>a,b</sup>, Hongjuan Xi<sup>a</sup>, Jun Ren<sup>c</sup>, Minggui Lin<sup>a</sup>, Qiang Wang<sup>a</sup>, Litao Jia<sup>a</sup>, Bo  
Hou<sup>a,\*</sup>, and Debao Li<sup>a,\*</sup>

<sup>a</sup> State Key Laboratory of Coal Conversion, Institute of Coal Chemistry, Chinese  
Academy of Sciences, Taiyuan 030001, People's Republic of China

<sup>b</sup> University of Chinese Academy of Sciences, Beijing 100049, People's Republic of  
China

<sup>c</sup> School of Chemical and Environmental Engineering, North University of China,  
Xueyuan Road 3, Taiyuan, 030051, China

\* Corresponding Author

E-mail: houbo@sxicc.ac.cn.

dbli@sxicc.ac.cn.

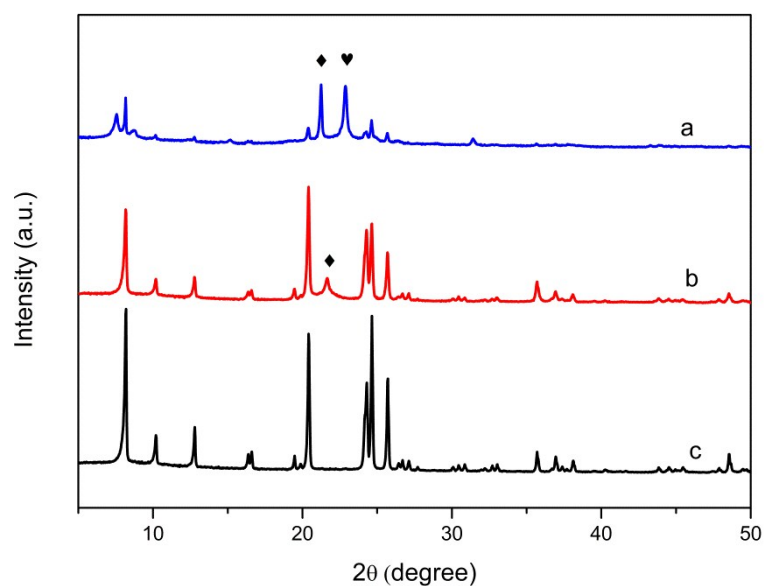

23

24 Figure S1. XRD patterns of samples obtained under different crystallization  
 25 conditions. (a) crystallization without seeds at 160 °C, (b) crystallization with seeds at  
 26 160 °C, and (c) crystallization with seeds at 150 °C.

27

28 Figure S2 shows the XRD patterns of Z-40, Z-60, Z-100 and Z-Si. The relative  
 29 intensity of diffraction peaks was enhanced with increasing of the Si/Al ratio. Strong  
 30 peak at  $24.65^\circ$  was observed upon increasing of the Si/Al ratio, which became much  
 31 stronger in siliceous ZSM-22. The differences are mainly caused by the difference in  
 32 crystal growth where aluminum plays a significant role in the formation of ZSM-22  
 33 crystal<sup>1</sup>.

34

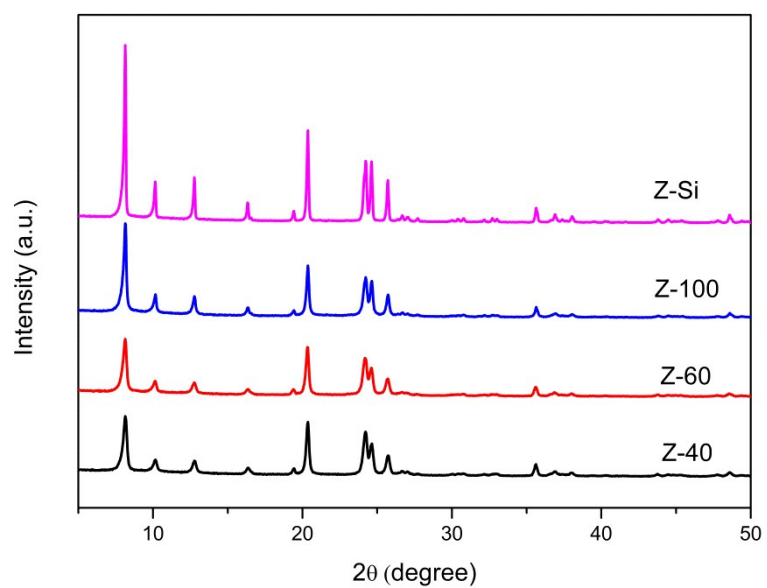

35

36 Figure S2. XRD patterns of Z-40, Z-60, Z-100 and Z-Si.

37

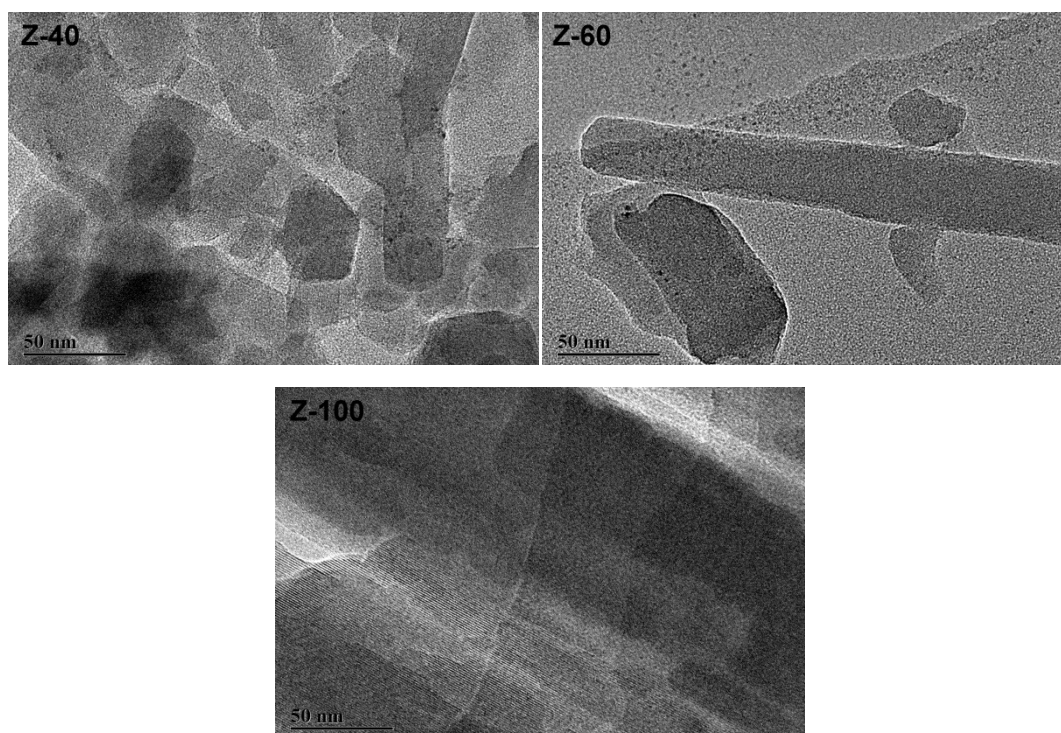

38

39

40 Figure S3. TEM images of Z-40, Z-60, and Z-100.

41

42

43

44

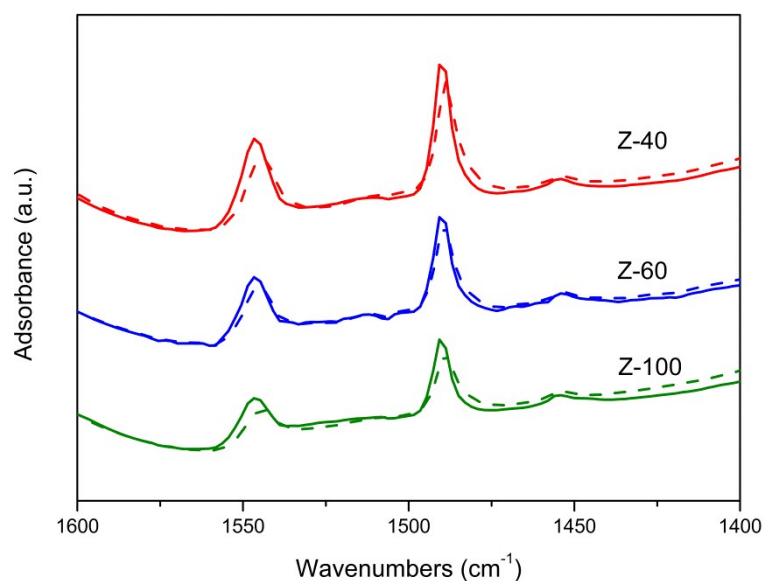

45

46 Figure S4. IR spectra of pyridine adsorbed on different samples at 200 °C (solid line)  
47 and 350 °C (dash line)

48

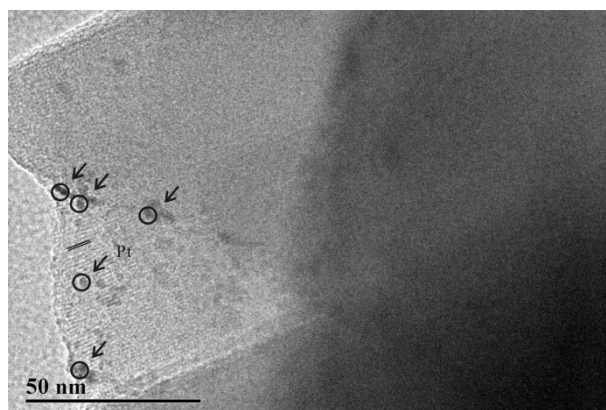

49

50 Figure S5. TEM image of Pt/Z-Si.

51

52 After HCl and alkaline solution treatment, the relative crystallinity and the textural  
53 properties of the two samples did not change obviously, shown in Figure S6 and S7.

54 The textural properties of Z-Si, Z-Si-HCl and Z-Si-AT are listed in Table S1.

55 Both of Z-Si-HCl and Z-Si-AT were observed a weak signal centered at around -

56 103 ppm assigned to  $Q^3$  environment, indicating the presence of defective sites. The  
 57 presence of defective sites was also confirmed by  $^1H^{29}Si$  CPMAS NMR spectrum of  
 58 the two samples shown in Figure S8 (b). Structural defects ( $HO-Si-[(OSi)_3]$ ) and  
 59 ( $[HO]_2-Si-[(OSi)_2]$ ) can be detected after alkaline solution treatment.

60

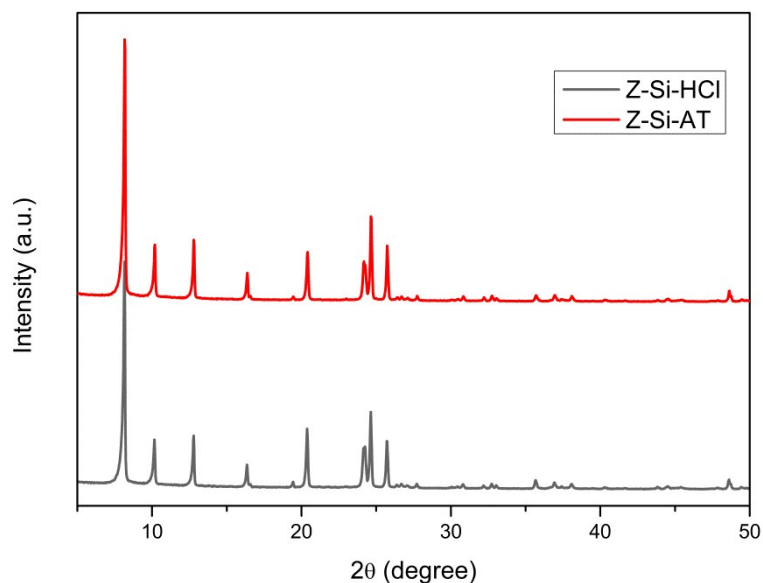

61

62 Figure S6. XRD patterns of Z-Si-HCl and Z-Si-AT.

63

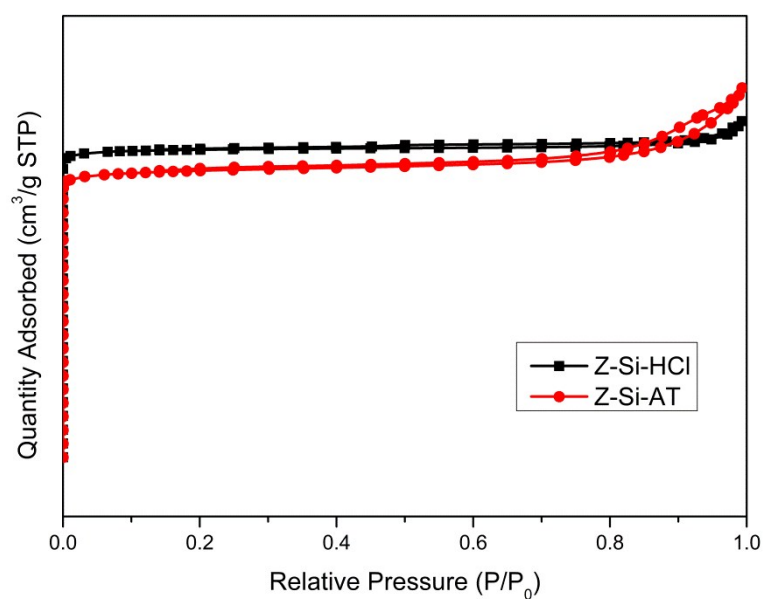

64

65 Figure S7.  $N_2$  adsorption isotherms of Z-Si-HCl and Z-Si-AT.

66 Table S1. Textural characterization of Z-Si, Z-Si-HCl and Z-Si-AT

| Samples  | Si/Al <sup>a</sup> | S <sub>BET</sub><br>(m <sup>2</sup> g <sup>-1</sup> ) | S <sub>micro</sub><br>(m <sup>2</sup> g <sup>-1</sup> ) | S <sub>ext</sub><br>(m <sup>2</sup> g <sup>-1</sup> ) | V <sub>micro</sub><br>(cm <sup>3</sup> g <sup>-1</sup> ) | Brønsted<br>acid<br>(μmol g <sup>-1</sup> ) |
|----------|--------------------|-------------------------------------------------------|---------------------------------------------------------|-------------------------------------------------------|----------------------------------------------------------|---------------------------------------------|
| Z-Si     | 990                | 279                                                   | 266                                                     | 13                                                    | 0.10                                                     | 13                                          |
| Z-Si-HCl | 1344               | 293                                                   | 287                                                     | 6                                                     | 0.10                                                     | 7                                           |
| Z-Si-AT  | 950                | 275                                                   | 263                                                     | 12                                                    | 0.10                                                     | 5                                           |

67 <sup>a</sup> Determined by ICP-OES.

68

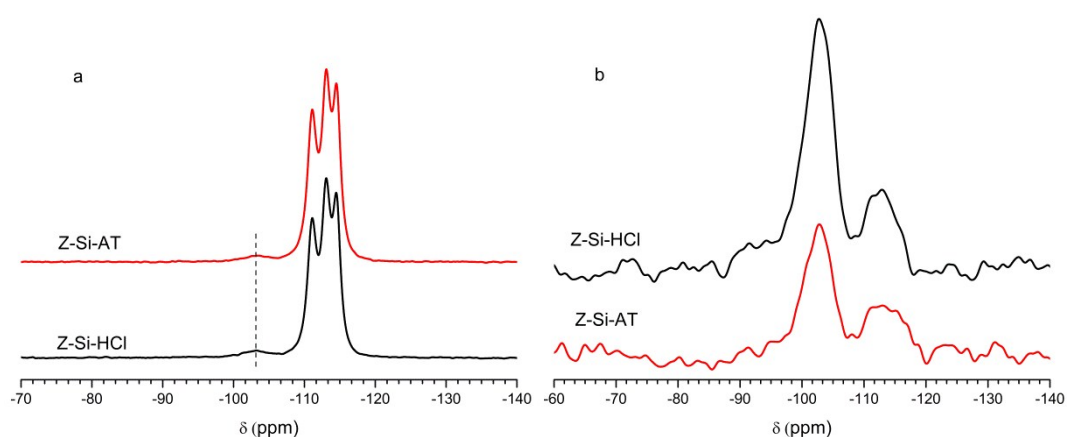

69

70 Figure S8. (a) <sup>29</sup>Si MAS NMR spectra and (b) <sup>1</sup>H<sup>29</sup>Si CPMAS NMR spectrum of Z-  
71 Si-HCl and Z-Si-AT.

72

73 Table S2. CO chemisorption of Pt/Z-40 and Pt/Z-Si.

| Catalysts | Pt dispersion (%) | Pt particle diameter (nm) |
|-----------|-------------------|---------------------------|
| Pt/Z-40   | 53.57             | 2.11                      |
| Pt/Z-Si   | 20.51             | 5.52                      |

74

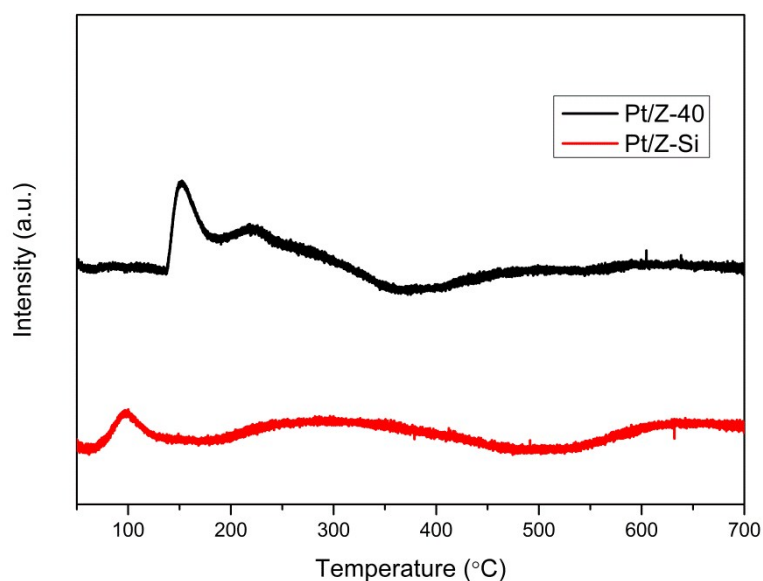

75

76 Figure S9. H<sub>2</sub> TPR spectra of the different samples.

77

78 The detailed mechanism for how linear alkenes are transformed into branched  
 79 alkenes over acidic zeolites has also been extensively investigated by theoretical  
 80 chemistry methods, which conclude that linear alkoxide intermediates formed upon  
 81 adsorption are more stable than physisorbed linear alkenes. Moreover, the  
 82 isomerization of a linear alkoxide into a branched alkoxide occurs via a protonated  
 83 cyclopropane species as a transition state which is energetically favored compared to  
 84 directly shifting the alkyl group.<sup>2, 3</sup> The mechanism for 1-octene hydroisomerization  
 85 involves (i) 1-octene adsorption on the zeolite acid site to form physisorbed  $\pi$ -  
 86 complex, (ii) and then to form a linear alkoxide species, (iii) isomerization of this  
 87 linear alkoxide species into a branched alkoxide species, (iv) desorption of the  
 88 branched alkoxide to form a mono-branched alkene and concurrent regeneration of  
 89 the zeolitic acid site.

90 The basic steps for this mechanism have already been briefly outlined (see Figure 13).

91 The starting structure is a physisorbed  $\pi$ -complex, and then a linear alkoxide is  
92 formed via one step hydrogenation with a lower energy barrier 46.3 and 84.9 kJ/mol  
93 on silica-alumina and siliceous ZSM-22, respectively. This obtained a protonized  
94 molecule representing the first transition state (TS 1), shown in Figure S3. The next  
95 step starts from adsorbed alkoxide and forms an important configuration along the  
96 reaction energy path corresponds to a stable charged cyclopropane intermediate (see  
97 Figure S10), and this energy barrier is 78.2 and 137.0 kJ/mol on silica-alumina and  
98 siliceous ZSM-22, respectively. For the ring opening via the deprotonation of the  
99 cyclopropane configuration, the activation energy of 47.3 kJ/mol for silica-alumina  
100 ZSM-22 is obtained, which is lower than that of siliceous ZSM-22 with activation  
101 energy of 79.1 kJ/mol. The final reaction step is that the proton is transferred back to  
102 the acid site and binds to the C3 carbon atom, and C3-C4 carbon bond is broken to  
103 form branched alkoxide. The complete reaction pathway is depicted in Figure 13. The  
104 overall reaction, beginning from a physisorbed  $\pi$ -complex to a branched one, involves  
105 in total three transition states and two intermediates. The imaginary frequency of all  
106 transition states is listed in Table S3.

107



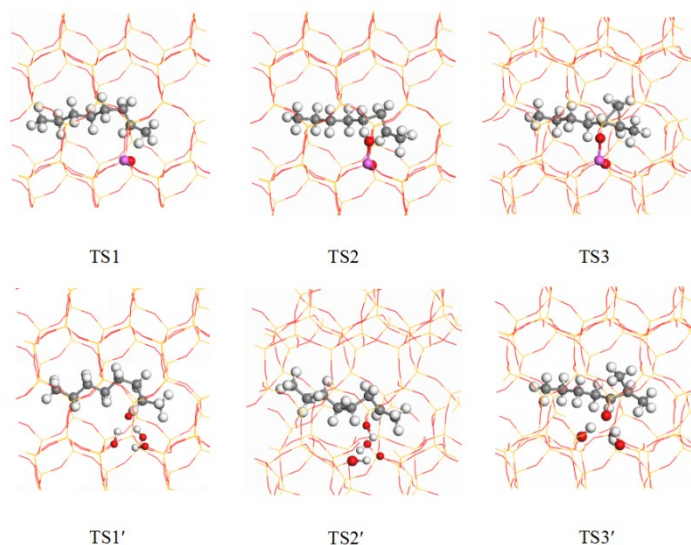

108

109 Figure S10. Transition state geometries (TS1-3 and TS1'-3') for catalytic  
110 isomerization of 1-octene in silica-alumina and siliceous ZSM-22, respectively.

111

112 Table S3. The imaginary frequency of all transition states.

| Transition state | imaginary frequency |
|------------------|---------------------|
| TS1              | 212 <i>i</i>        |
| TS1'             | 189 <i>i</i>        |
| TS2              | 180 <i>i</i>        |
| TS2'             | 175 <i>i</i>        |
| TS3              | 162 <i>i</i>        |
| TS3'             | 207 <i>i</i>        |

113

## 114 **References**

- 115 1. K. Hayasaka, D. Liang, W. Huybrechts, B. R. De Waele, K. J. Houthoofd, P. Eloy, E. M.  
116 Gaigneaux, G. van Tendeloo, J. W. Thybaut, G. B. Marin, J. F. M. Denayer, G. V. Baron, P. A.  
117 Jacobs, C. E. A. Kirschhock and J. A. Martens, *Chem.-Eur. J.*, 2007, **13**, 10070-10077.
- 118 2. T. Demuth, X. Rozanska, L. Benco, J. Hafner, R. A. van Santen and H. Toulhoat, *J. Catal.*, 2003,  
119 **214**, 68-77.
- 120 3. M. Boronat, P. Viruela and A. Corma, *Journal of Physical Chemistry*, 1996, **100**, 16514-16521.
